# Supplementary material for: Can Dogs’ Origins and Interactions with Humans Affect Their Accomplishments? A Study on the Responses of Shelter and Companion Dogs during Vocal Cue Training
Source: MDPI journal article supplement (doi:10.3390/ani11051360), 2021-05-11
Supplement: s1 [file s1]

Table S1. Generalized Linear Model of the effect of dog size (weight) on dog performance (Number of sessions to learn cues, Number of dogs that reached learning criterion, Cues answered, Cue repetition, Latency to respond to the cues), recorded during the last training session of shelter and companion dogs.

| <b>Parameters</b> | <b>Estimate <math>\pm</math> SD</b> | <b>z-value</b> | <b><i>p</i></b> |
|-------------------|-------------------------------------|----------------|-----------------|
| (intercept)       | 1.69905 $\pm$ 0.21929               | 7.748          | <0.0001         |
| Sessions          | -0.01149 $\pm$ 0.02271              | -0.506         | 0.61            |
| (intercept)       | 0.66145 $\pm$ 0.36760               | 1.799          | 0.07            |
| Dogs that learnt  | -0.01076 $\pm$ 0.03803              | -0.283         | 0.78            |
| (intercept)       | 3.33430 $\pm$ 0.09761               | 34.160         | <0.0001         |
| Cues answered     | -0.01423 $\pm$ 0.01014              | -1.403         | 0.16            |
| (intercept)       | 2.068630 $\pm$ 0.171283             | 12.077         | 0.61            |
| Cue repetition    | 0.008917 $\pm$ 0.017291             | 0.516          | 0.6             |
| (intercept)       | 4.525235 $\pm$ 0.056192             | 80.532         | 0.61            |
| Latency           | 0.004433 $\pm$ 0.005916             | 0.749          | 0.45            |
